# Supplementary material for: Estimating the number needed to treat from continuous outcomes in randomised controlled trials: methodological challenges and worked example using data from the UK Back Pain Exercise and Manipulation (BEAM) trial
Source: BMC Med Res Methodol. 2009 Jun 11;9:35. doi: 10.1186/1471-2288-9-35 (PMC2702335; doi:10.1186/1471-2288-9-35)
Supplement: Additional file 1 — Supplement. A word document detailing equations for both of the methods described. Stata modules to perform these tasks are available from the corresponding author on request. [file 1471-2288-9-35-S1.doc]

**Supplement**

We calculated NNT and confidence intervals for ‘improvement’ (Method one) as follows. [34]

Let *n*0 and *n*1 be the number of patients in the control and the treatment group, respectively, and let *e*0 and *e*1 be the number of patients improving in the control and the treatment group, respectively. The probability of ‘improvement’ in the two groups can then be estimated by the proportions *p*0 = *e*0/*n*0 and *p*1 = *e*1/*n*1. The effect measures can be estimated by ARR = *p*0 − *p*1 and NNT = 1/(*p*0 − *p*1). Using this notation, the 100 × *(*1 − *α)*% confidence interval for ARR based upon Wilson scores is given by:


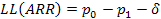


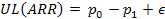


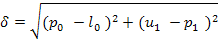


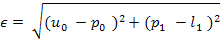


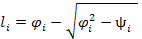


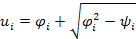


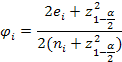


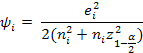


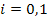


Where z1-a/2 is the (1-a/2)-quantile of the standard normal distribution.

The corresponding confidence limits for NNT can then be calculated by LL(NNT)=1/UL(ARR) and UL(NNT)=1/LL(ARR).

In order to calculate NNT and confidence intervals for ‘benefit’ (Method two), we modified the Wilson score method, as described by Bender, [34] by adding variance terms for deterioration. This was done as follows.

Let *eimp*0 and *eimp*1 be the number of patients improving in the control and the treatment group, respectively, and let *edet*0 and *edet*1 be the number of patients deteriorating in the control and the treatment group, respectively. The probability of ‘improvement’ in the two groups can then be estimated by the proportions *p*imp0 = *e*imp0/*n*0 and *pimp*1 = *eimp*1/*n*1. The probability of ‘deterioration’ in the two groups can then be estimated by the proportions *p*det0 = *e*det0/*n*0 and *pdet*1 = *edet*1/*n*1. The effect measures can be estimated by ARR = *p*imp0 – *p*det0 – *p*imp1 + *p*det1 and NNT = 1/( *p*imp0 – *p*det0 – *p*imp1 + *p*det1). Using this notation, the 100 × *(*1 − *α)*% confidence interval for ARR based upon Wilson scores is given by:


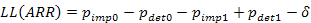


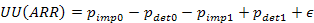


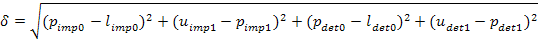


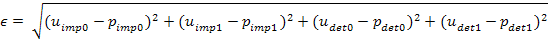


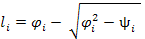


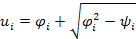


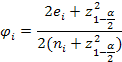


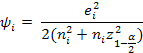


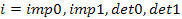


The corresponding confidence limits for NNT can then be calculated by LL(NNT)=1/UL(ARR) and UL(NNT)=1/LL(ARR).

We calculated minimally detectable change as follows.


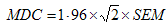


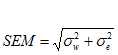


Where *MDC* is the minimally detectable change, *SEM* is the standard error of measurement, *w2* is the within person variance of stable participants’ repeated measurements, and *e2=*the residual variance of stable participants’ repeated measurements.
